# Supplementary material
Source: PubMed Central journal article supplement (PMC4913892)
Supplement: NIHMS764501-supplement-2.pdf [file NIHMS764501-supplement-2.pdf]

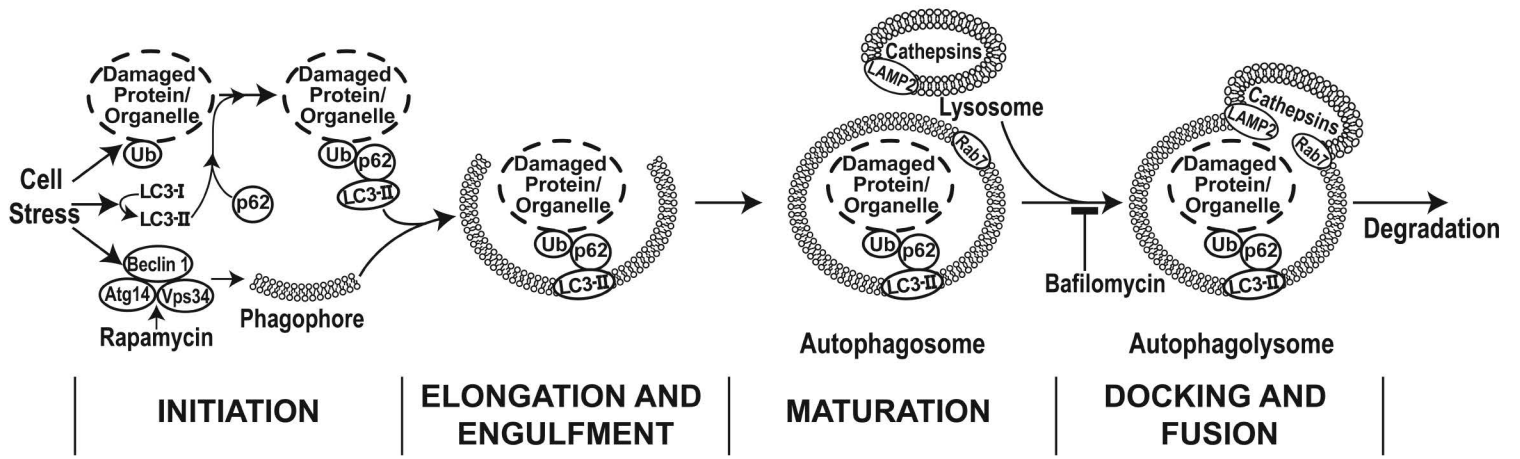

Fig 1

**A**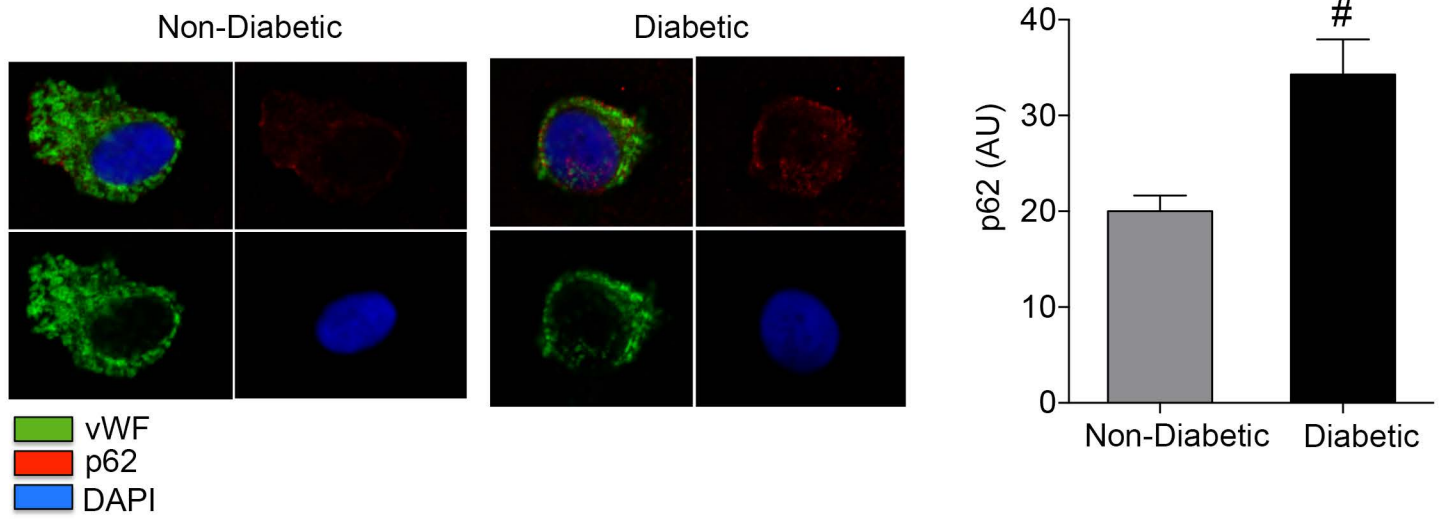**B**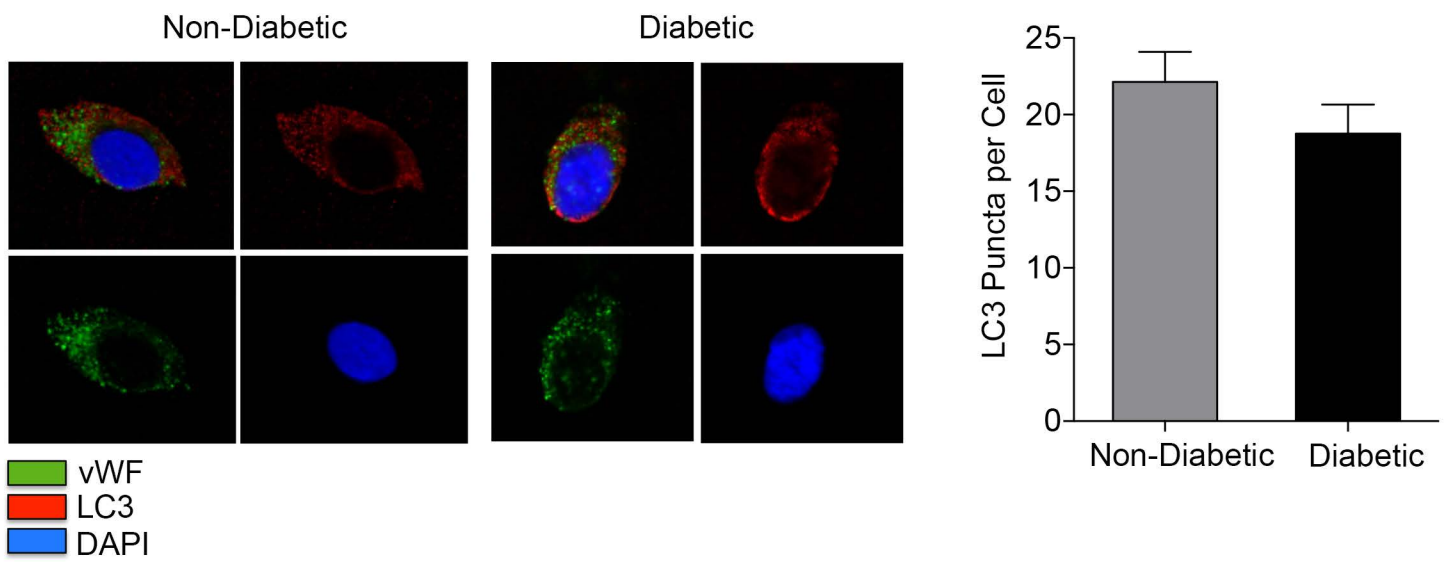**Fig 2**

**A**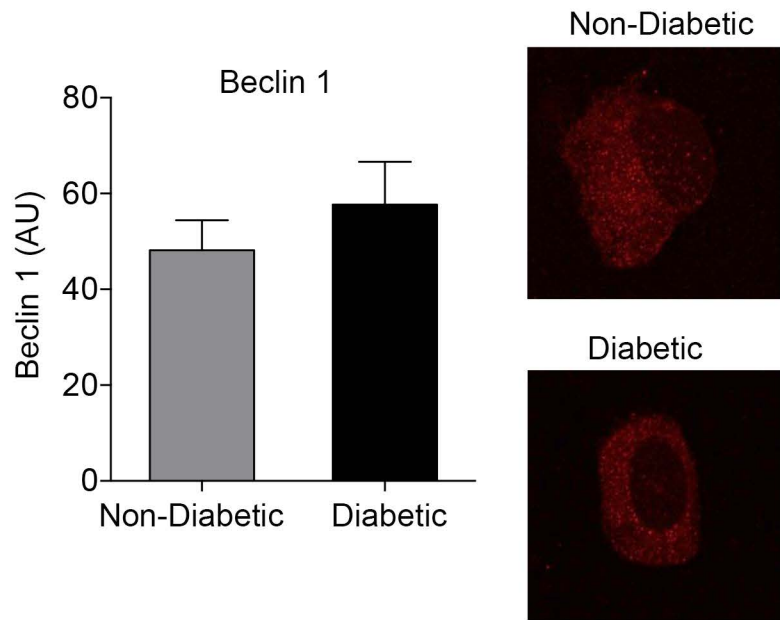**B**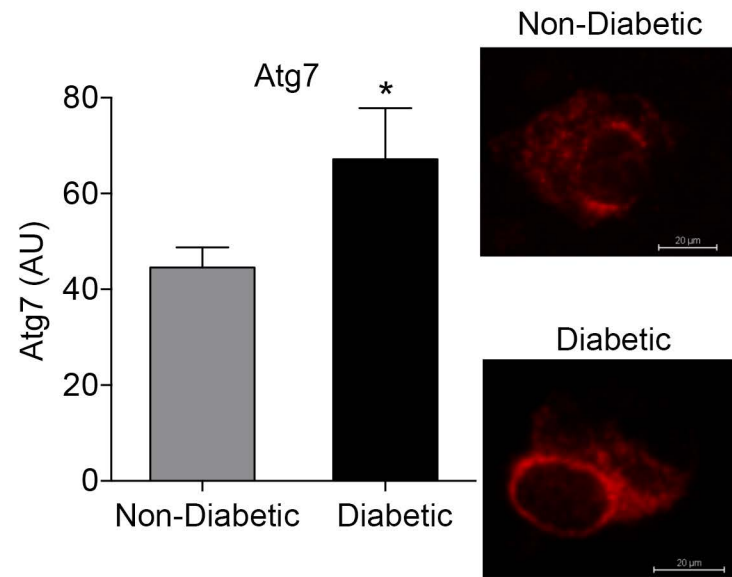**C**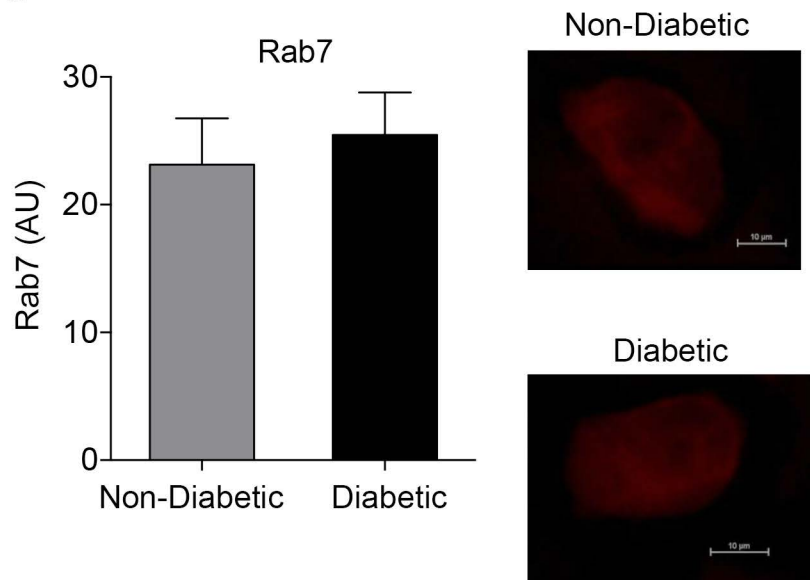**D**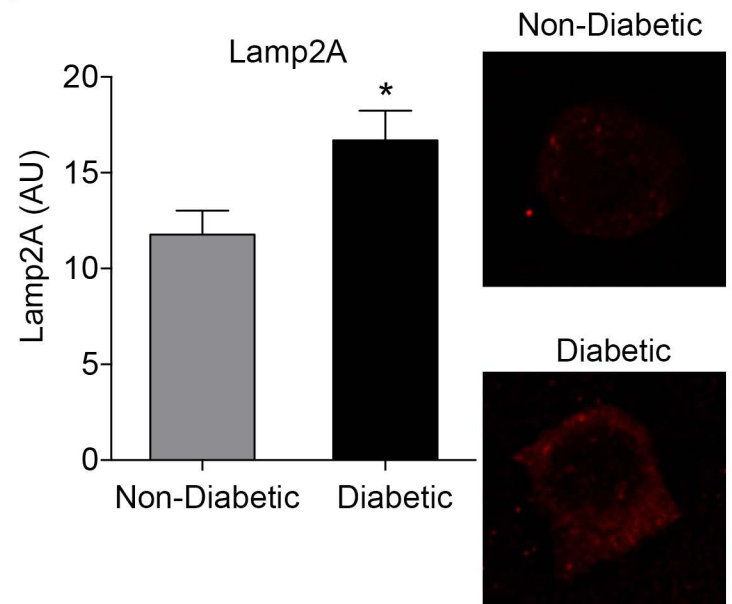**Fig 3**

**A**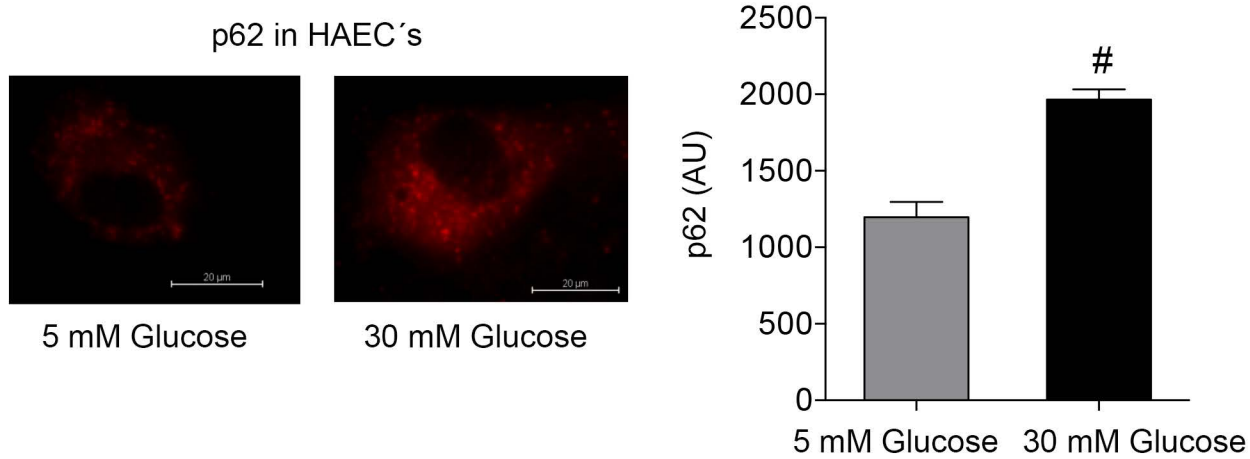**B**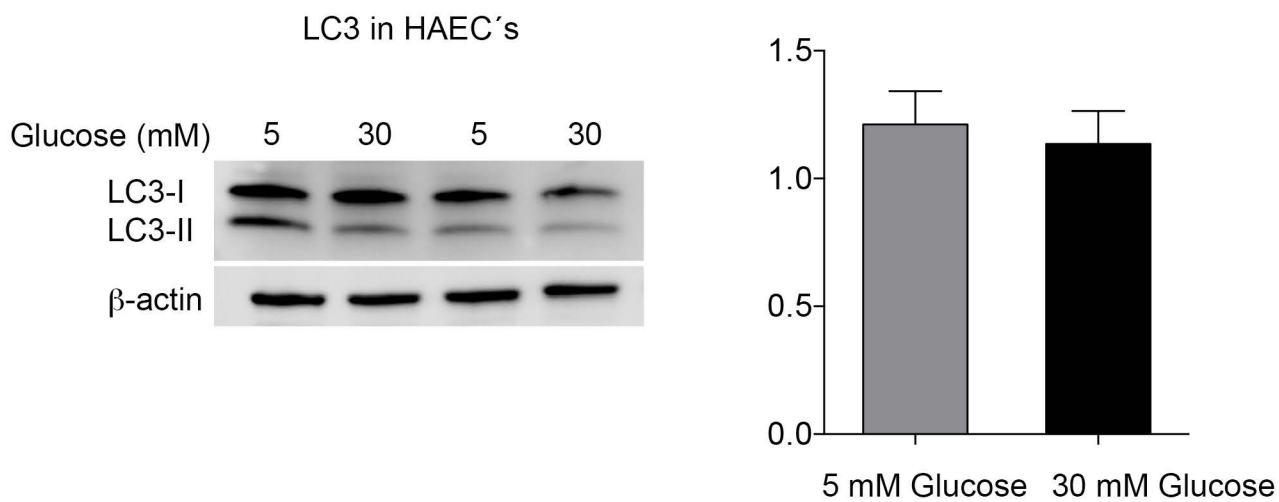**C**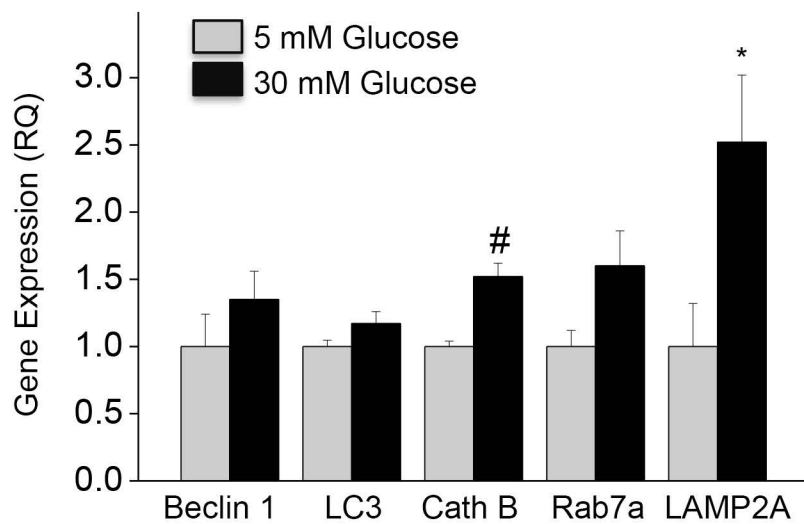**Fig 4**

**A**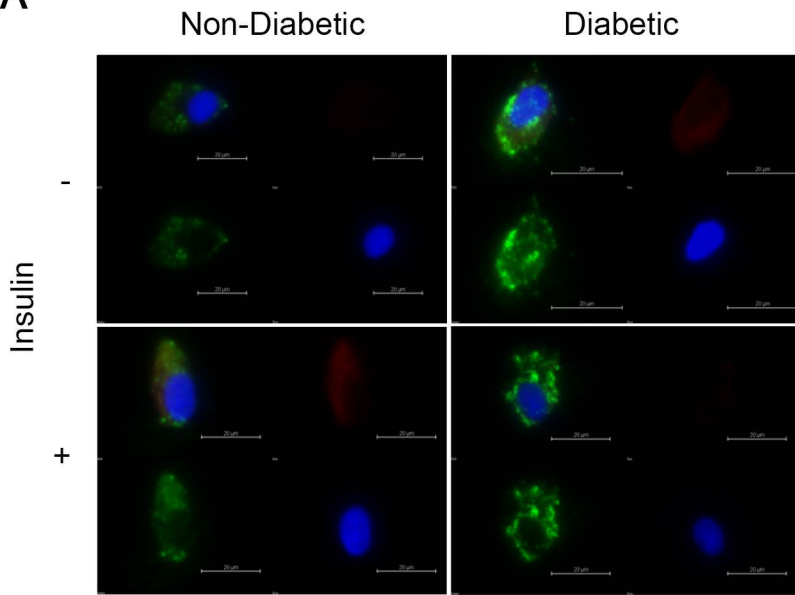**Insulin-Induced eNOS Activation**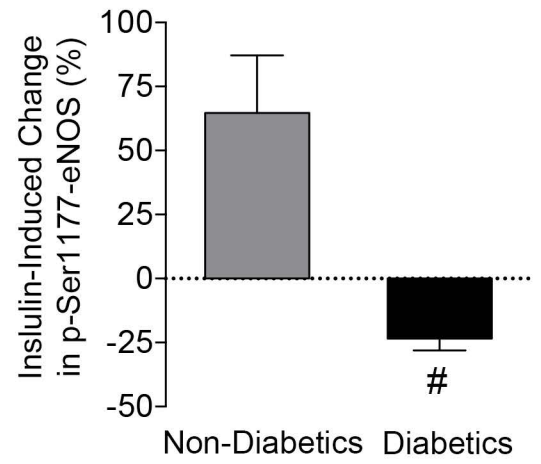**B**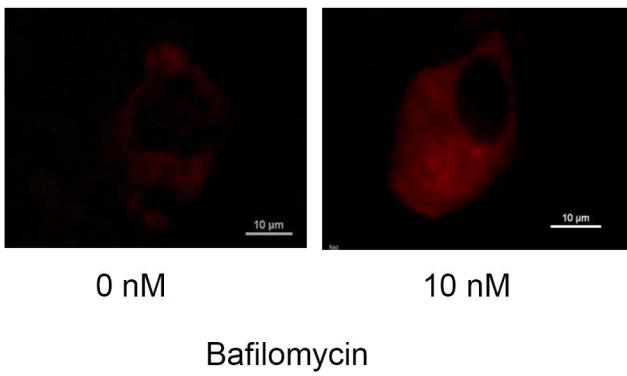**Bafilomycin-Induced Inhibition of Autophagy in Non-Diabetics**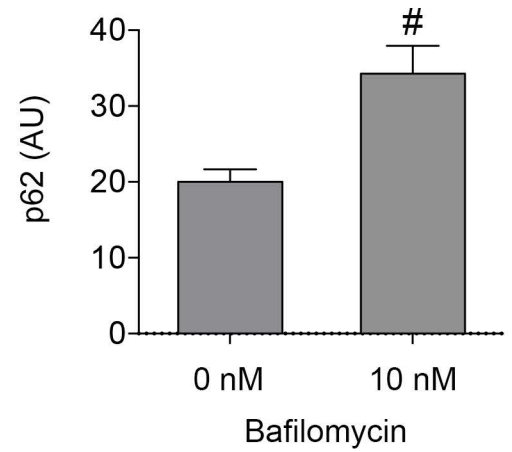**C**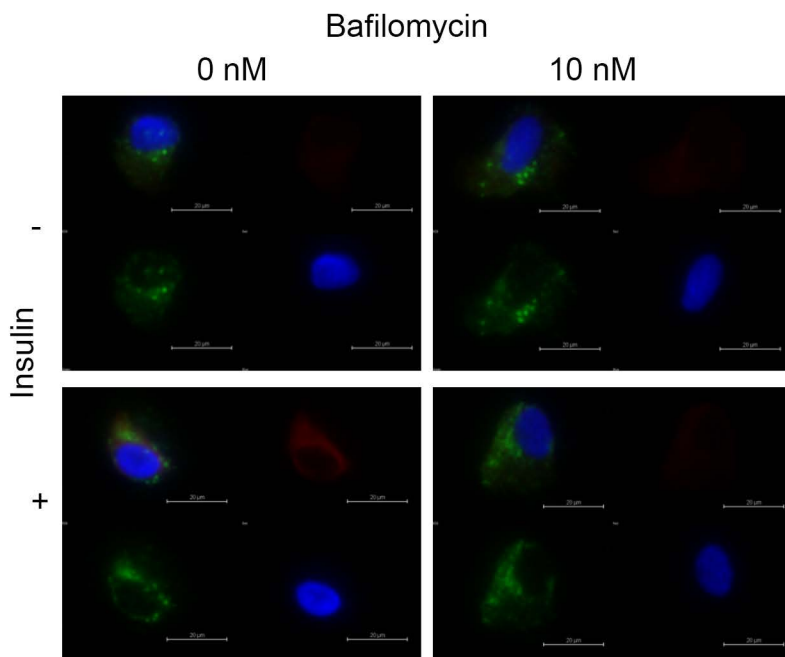**Insulin-Induced eNOS activation in Non-Diabetics**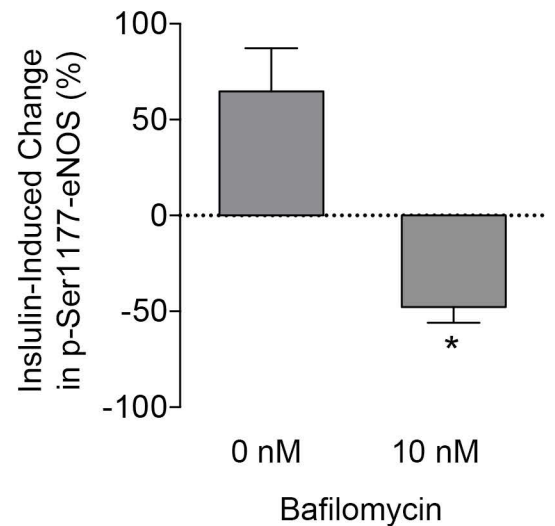**Fig 5**

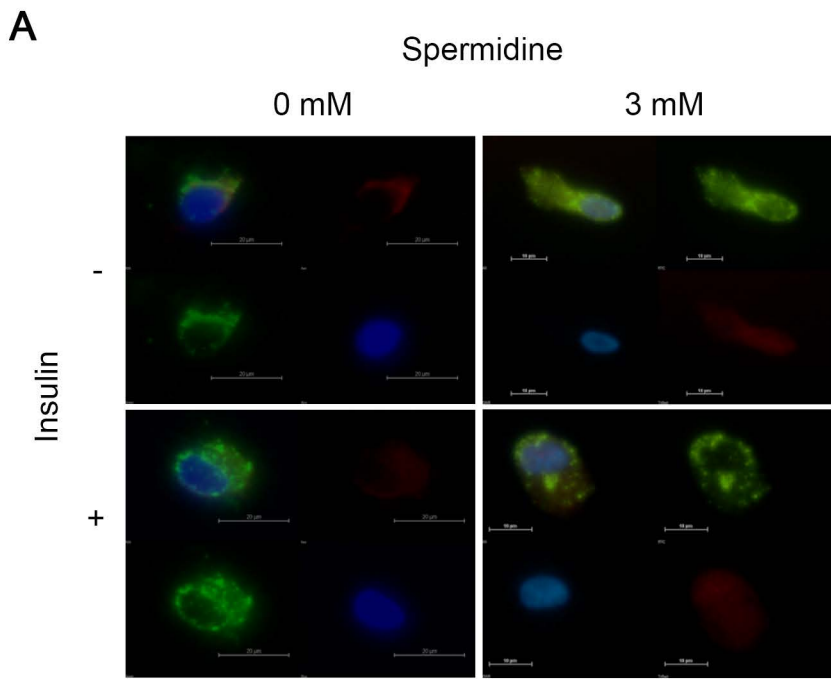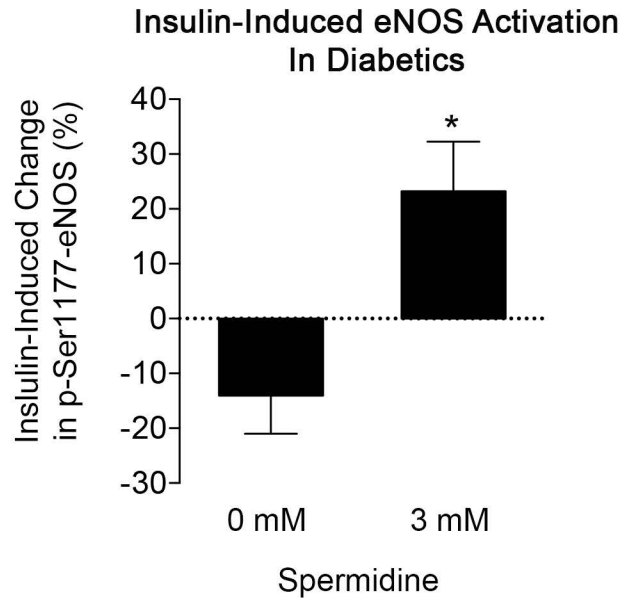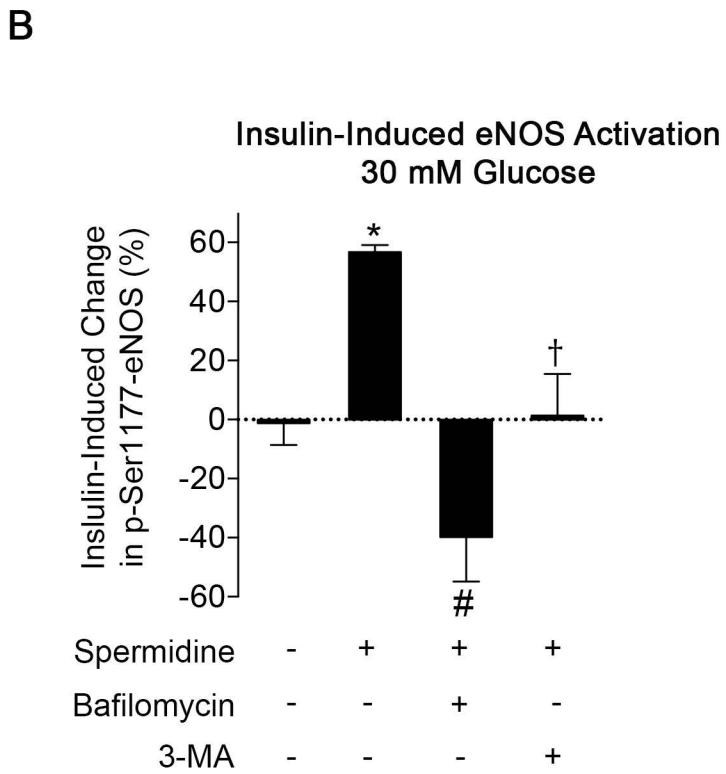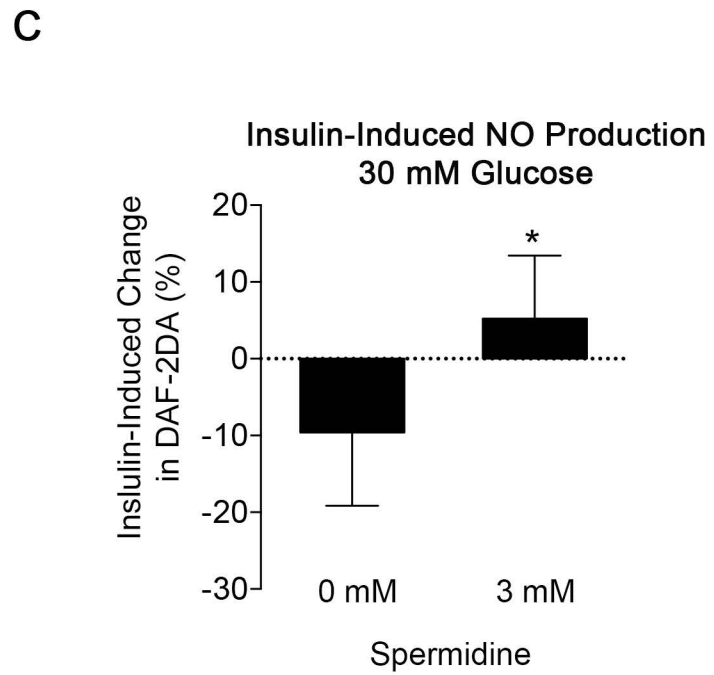

**Fig 6**

A

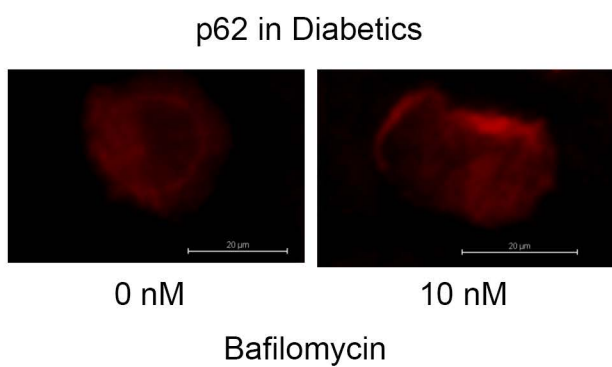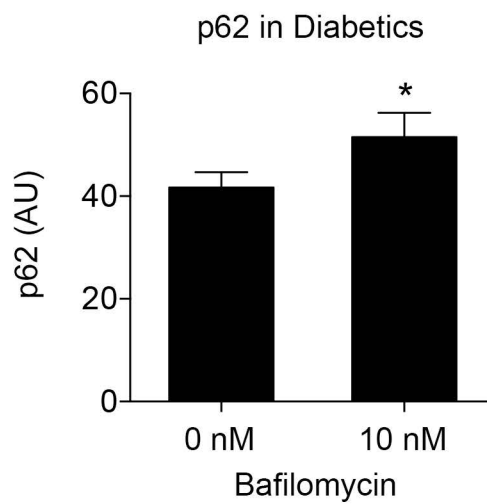

B

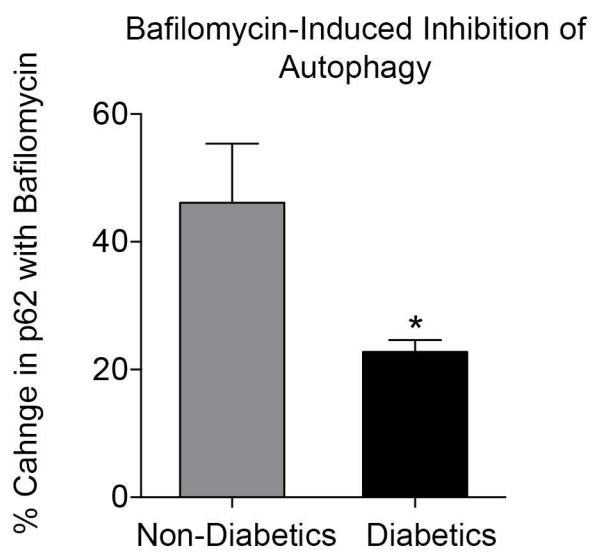

Fig 7
