# Supplementary material
Source: PubMed Central journal article supplement (PMC4913892)

LC3 in HAEC's

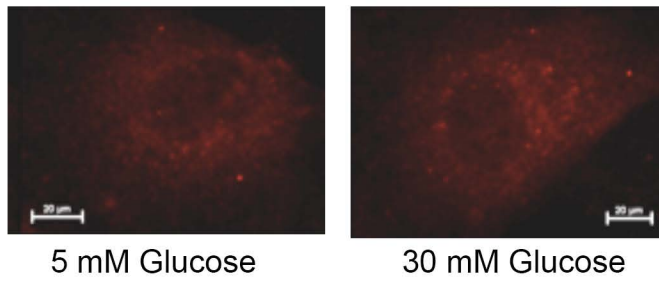

LC3 in HAEC's

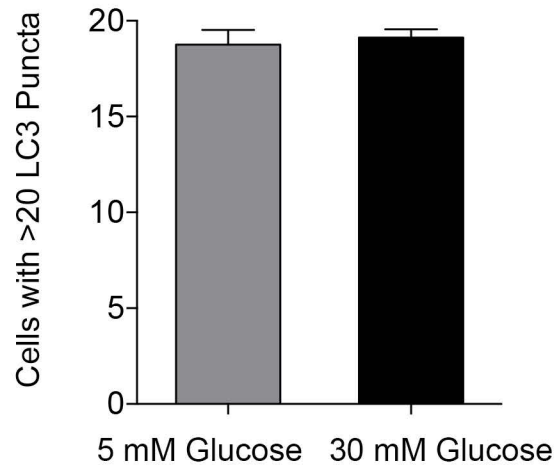

**A**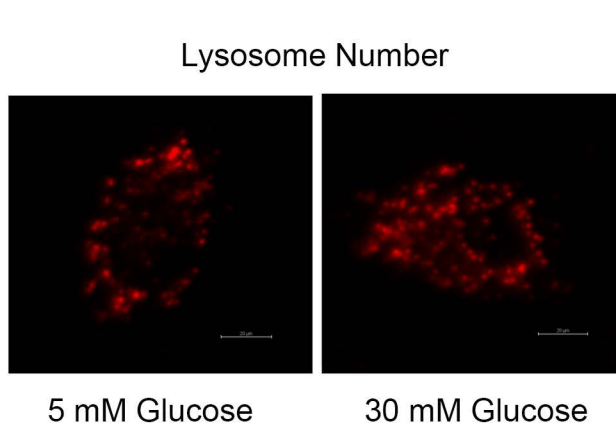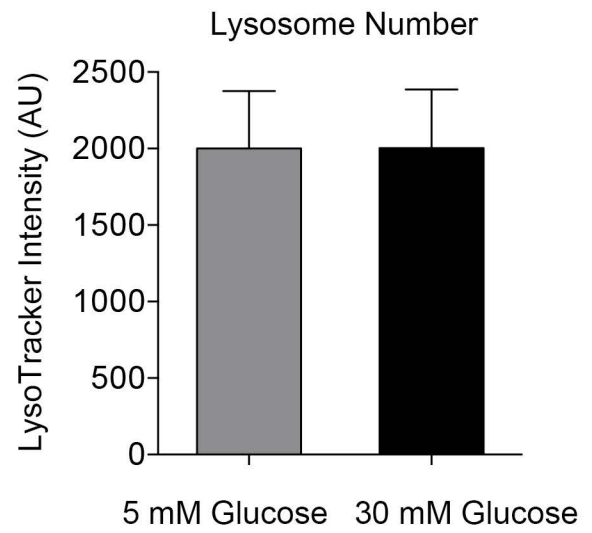**B**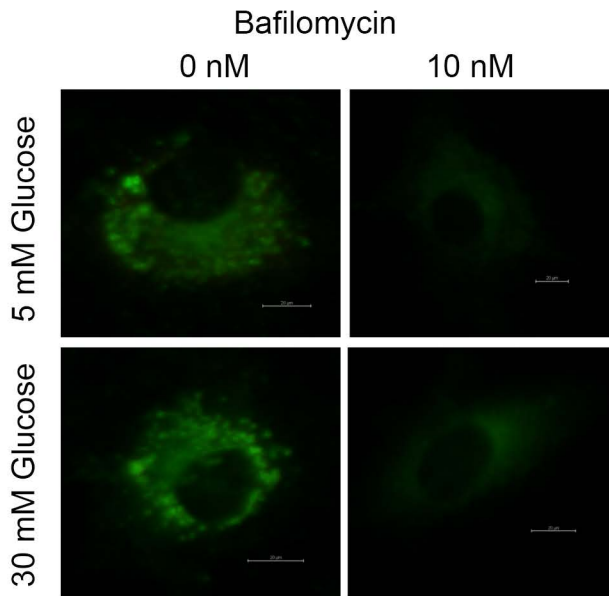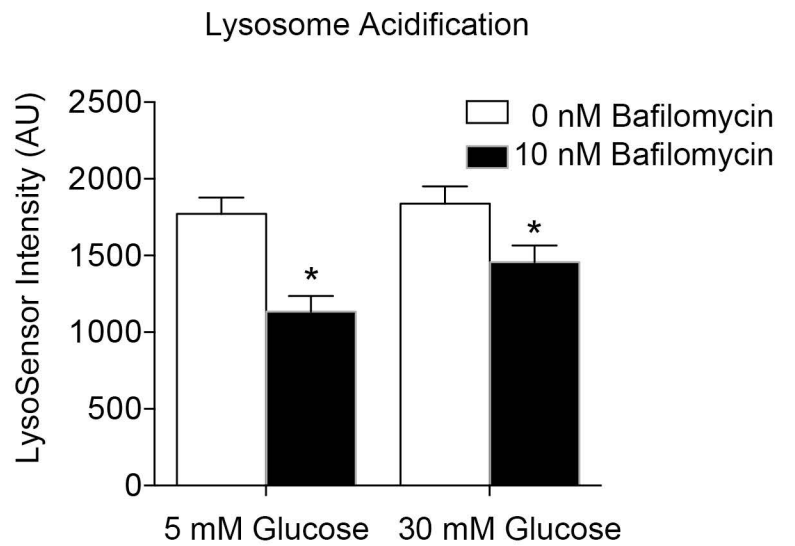

Bafilomycin

0 nM

10 nM

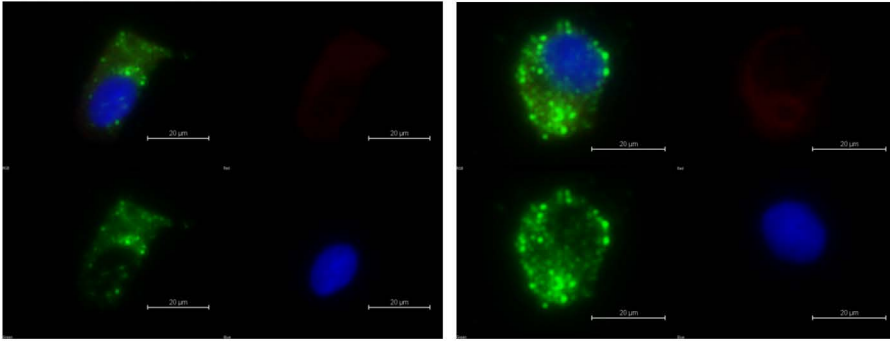

Basal p-eNOS in Non-Diabetics

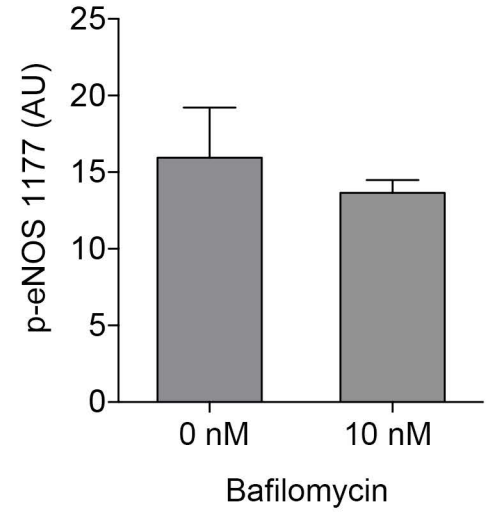

A

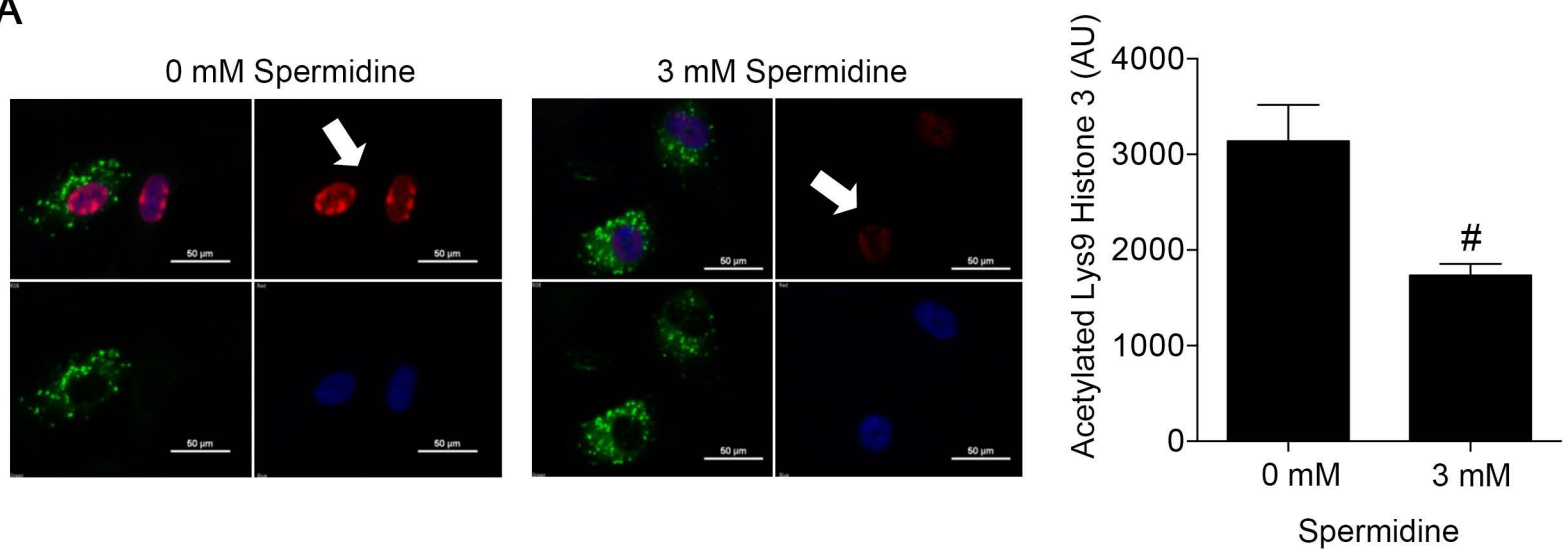

B

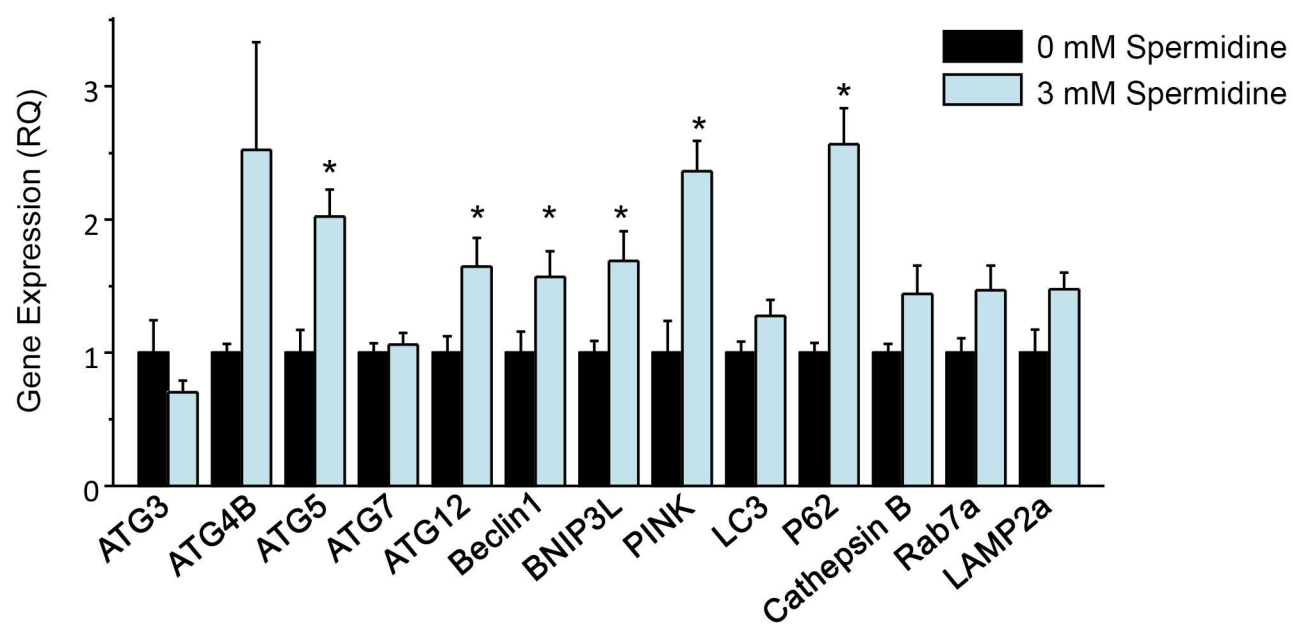

**A**

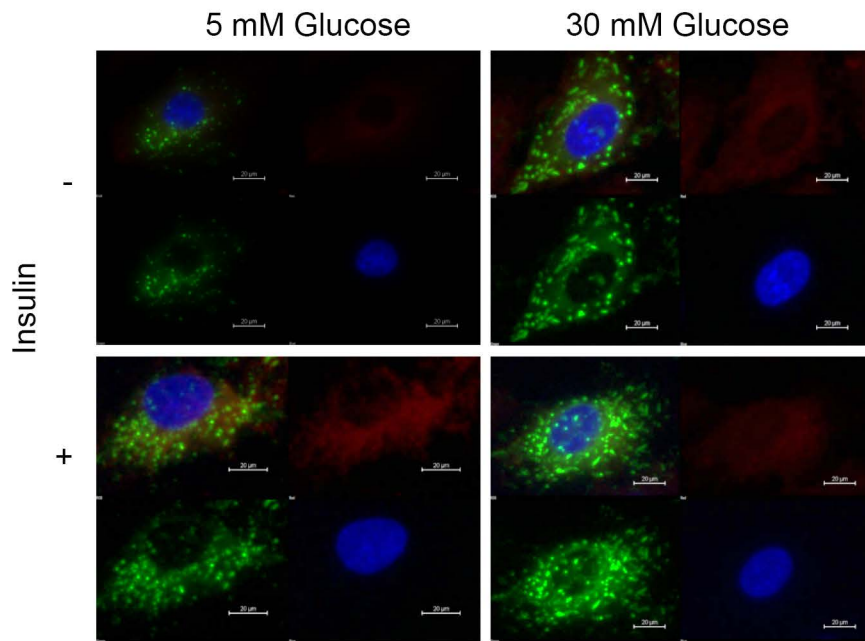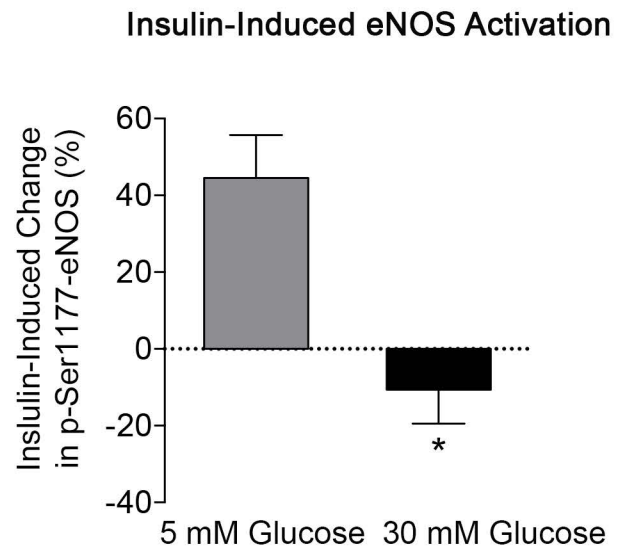

**B**

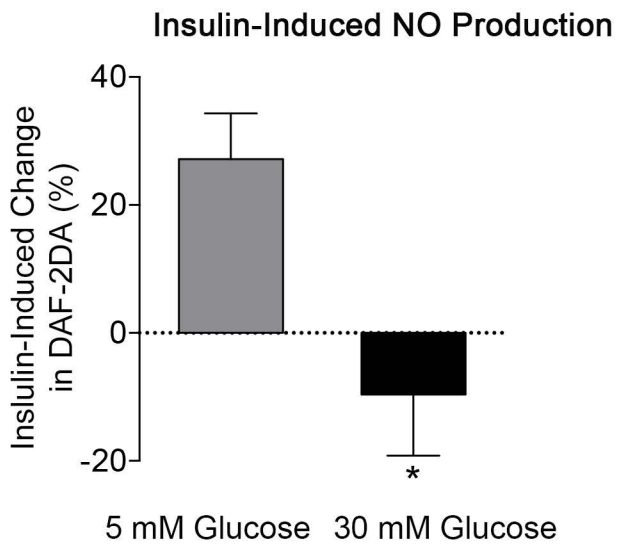

**A**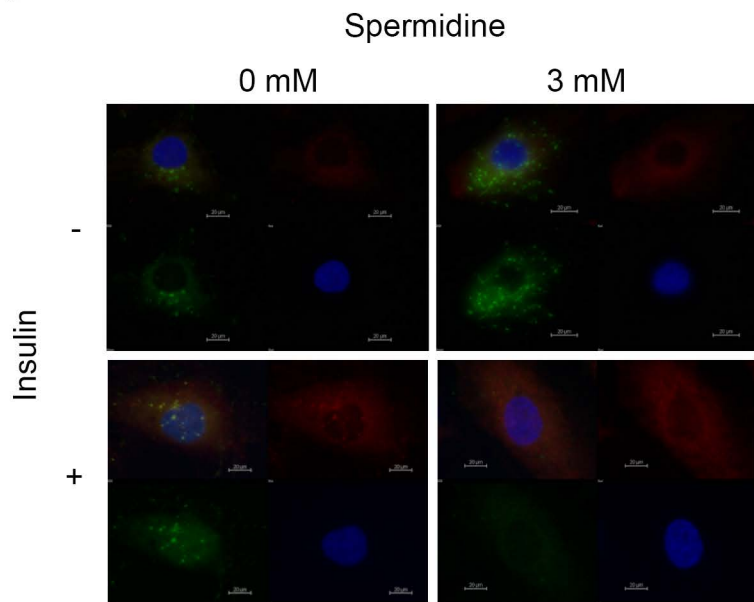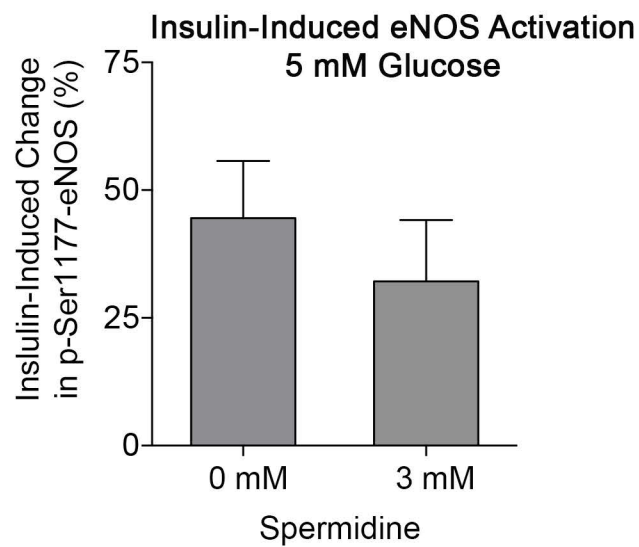**B**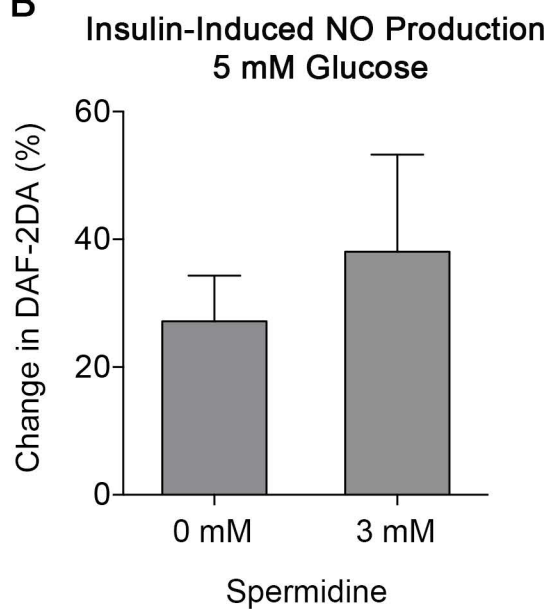**C**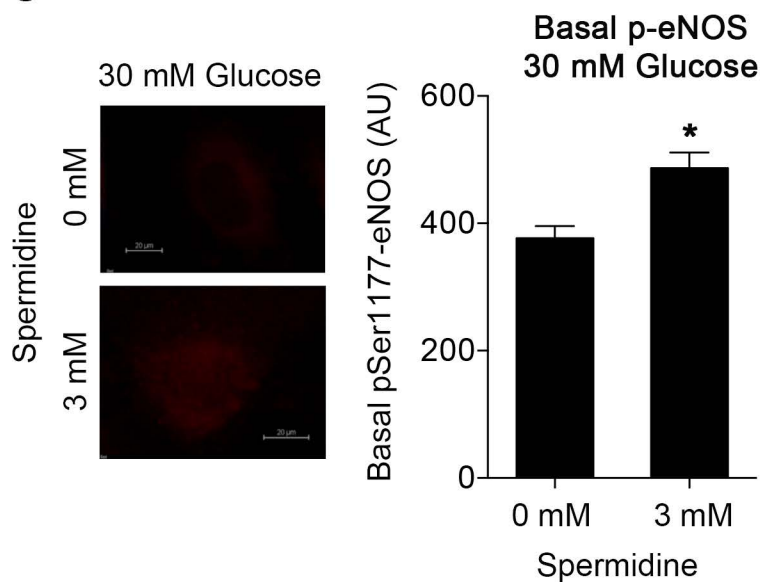**D**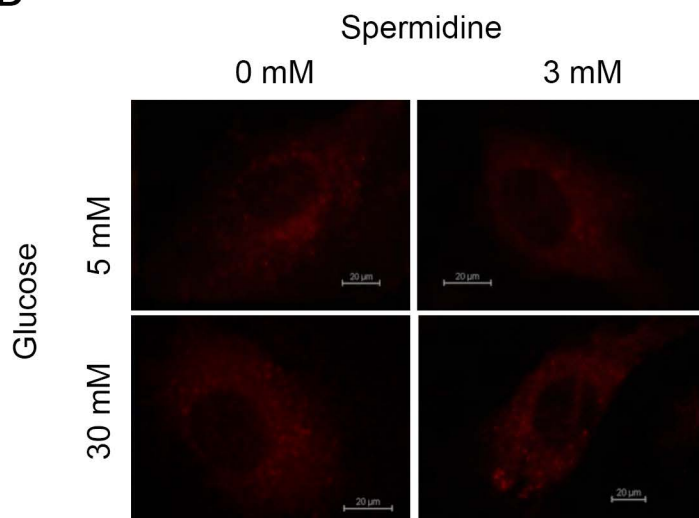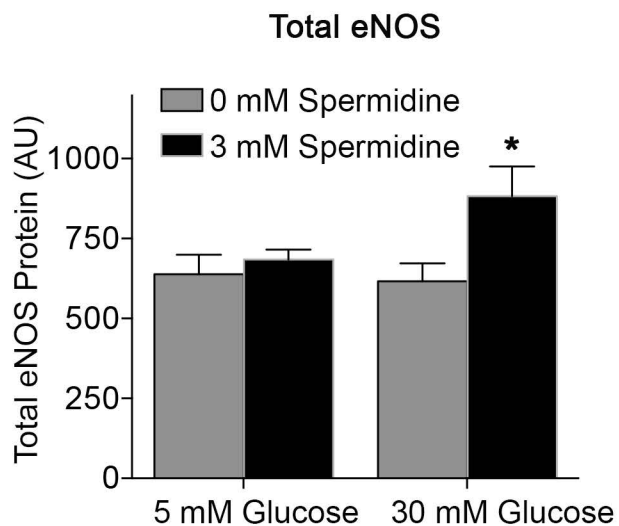

Supplement: NIHMS764501-supplement-3.pdf [file NIHMS764501-supplement-3.pdf]
